# Supplementary material
Source: publisher site journal article supplement (https://www.dovepress.com/get_supplementary_file.php?f=430904.docx)
Supplement: Supplementary file 1 [file get_supplementary_file.php]

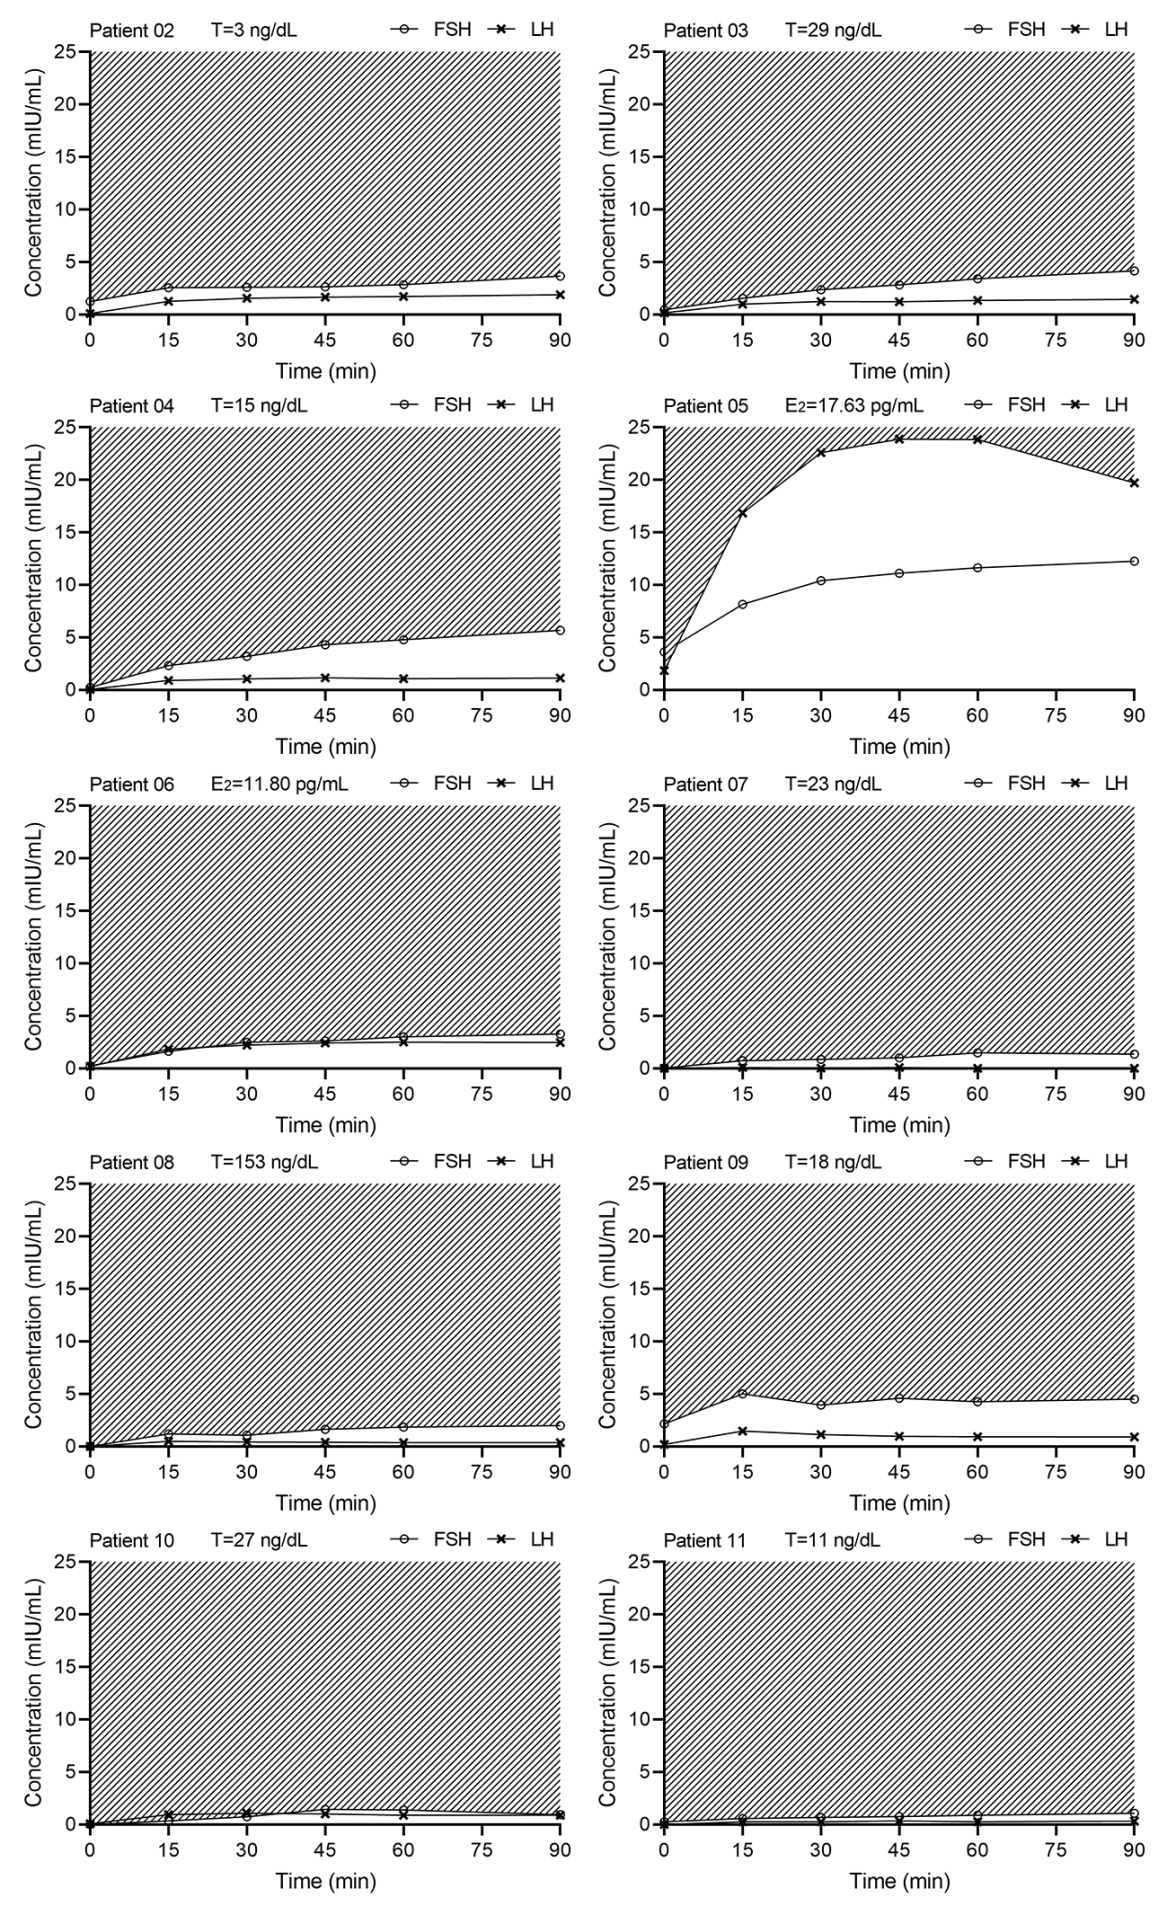


**Supplementary Figure 1** LH and FSH serum level of all patients, except for patient 01, were detected using the triptorelin excitation test at first visit. Only patient 05 showed the significantly increased serum LH and FSH levels after triptorelin administration.


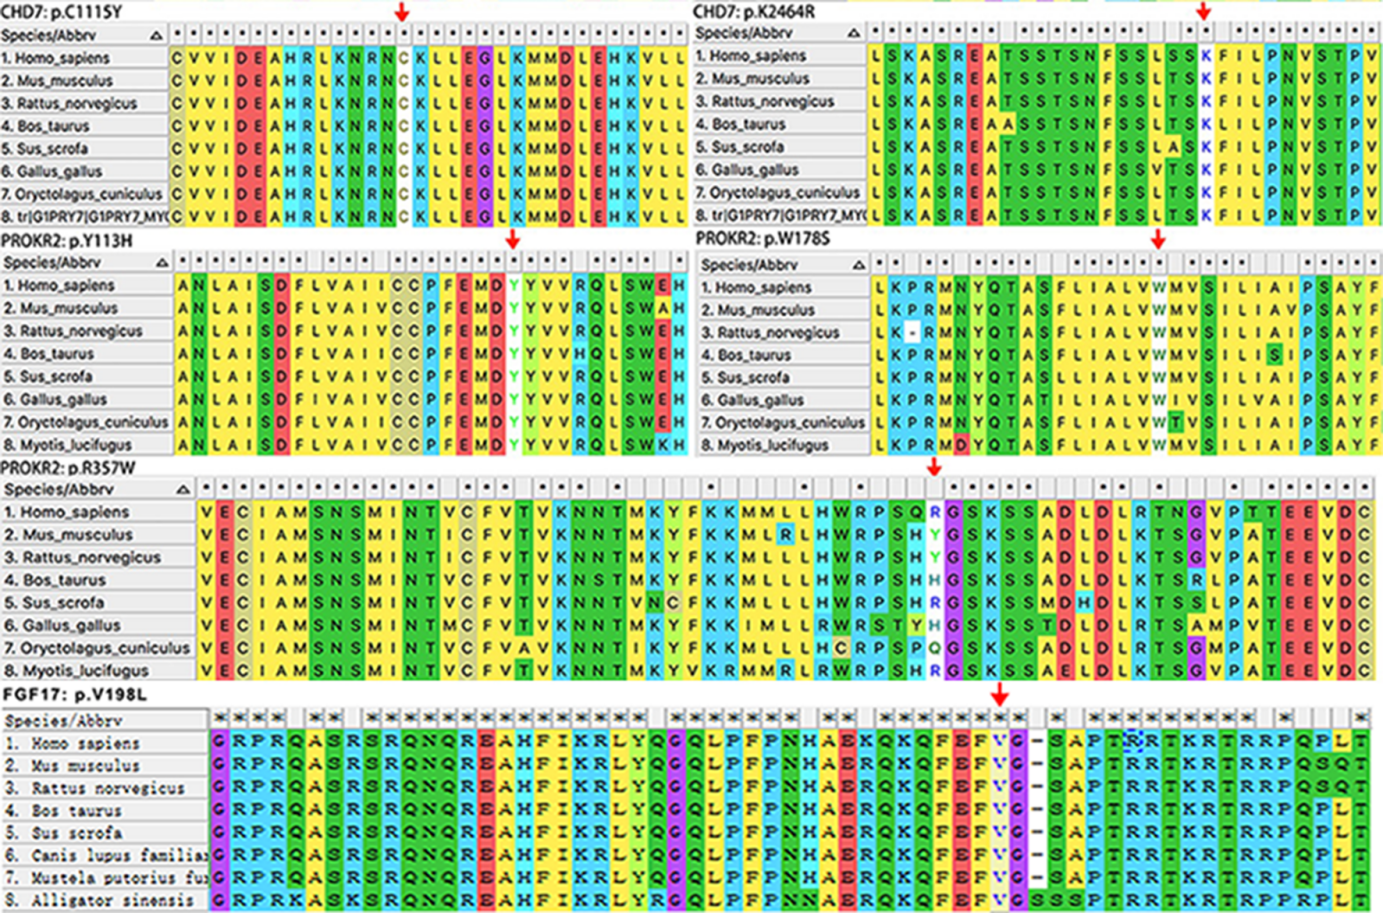


**Supplementary Figure 2** Conservative analysis of amino acid sequence near the site of PROKR2, CHD7 and FGF17 variants. The site of variation is highlighted in white, as well as indicated by the red arrow. The amino acid alignment across different species by MEGA X revealed that PROKR2 Tyrosine113, PROKR2 Tryptophan178, CHD7 Lysine2464, CHD7 Cysteine1115 and FGF17 Valine198 were located in the highly conserved region. Nevertheless, PROKR2 Arginine357 were non-conserved in all eight species.

**Supplementary Table 1** In silico prediction of protein function and minor allele frequency of variants in public database

| Variants | *In silico* prediction | | | | | | Minor allele frequency | | | |
| --- | --- | --- | --- | --- | --- | --- | --- | --- | --- | --- |
| SIFT | Polyphen-2 | PROVEAN | Condel | GERP++ | Splice AI | 1000G | ExAC | Gnom  AD | ESP  6500 |
| PROKR2, NM_144773.2,  c.337T>C, p.Tyr113His | 0  (D) | HumDiv (1.000,PD)  Humvar (1.000,PD) | -4.53  (DT) | 0.4997  (N) | 5.32  (C) | - | 0.000599 | 0.00014 | 0.00010606 | Absent |
| PROKR2, NM_144773.2,  c.533G>C, p.Trp178Ser | 0  (D) | HumDiv (1.000,PD)  Humvar (1.000,PD) | -12.34  (DT) | 0.7609  [DT] | 5.21  (C) | - | 0.0002 | 0.000181 | 0.00020505 | Absent |
| PROKR2, NM_144773.2,  c.1069C>T, p.Arg357Trp | 0.163  (T) | HumDiv (0.453,PD)  Humvar (0.068,B) | -1.16  (N) | 0.412358  (N) | 1.66  (NC) | - | Absent | 0.000115 | 0.00008131 | 0.000077 |
| CHD7, NM_017780.3,  c.7391A>G, p.Lys2464Arg | 0.194  (T) | HumDiv (1.000,PD)  Humvar (0.999,PD) | -0.46  (N) | 0.4206  (N) | 5.10  (C) | - | Absent | Absent | Absent | Absent |
| CHD7, NM_017780.3,  c.3344G>A, p.Cys1115Tyr | 0(D) | HumDiv (0.080,B)  Humvar (0.018,B) | -10.54  (DT) | 0.5473  (DT) | 5.72  (C) | - | Absent | Absent | 0.00000402 | Absent |
| FGF17, NM_003867.2,  c.592G>C, p.Val198Leu | 0.894(T) | HumDiv (0.002 B)  HumVar (0.006 B) | 0.282  (N) | 0.4363  (N) | 4.77  (C) |  | Absent | Absent | Absent | Absent |
| SOX10, NM_006941.3  c.429-1G>C | - | - | - | - | 4.45  (C) | 0.32/0.95/0.00/0.00/-16/-1/-38/-1 | Absent | Absent | Absent | Absent |
| WDR11, NM_018117.11  c.2931+6delC | - | - | - | - | - | 0.00/0.00/0.00/0.02/-39/-4/-5/-2 | Absent | Absent | Absent | Absent |

“-”: not available; T: tolerated; D: damaging; B: benign; PD: probably damaging; N: neutral; DT: deleterious; NC: non-conserved; C: conserved. Splice AI=DS_ AG/DS_AL/DS_DG/DS_DL/DP_AG/DP_AL/DP_DG/DP_DL. The cut-off of SIFT is 0.05. The cut off of HumDiv and Humvar for Polyphen-2 are 0.447 and 0.453, respectively. The cut off of PROVEAN is -2.5. The cut off of Condel is 0.522.
